# Supplementary material for: Charge transfer relaxation in donor–acceptor type conjugated materials
Source: Royal Society of Chemistry journal article supplement (doi:10.1039/c3tc00829k), 2013-01-01
Supplement: c3tc00829k.pdf [file c3tc00829k.pdf]

# Charge Transfer Relaxation in Donor-Acceptor Type Conjugated Materials

By *Mariateresa Scarongella, Andrey Laktionov, Ursula Rothlisberger and Natalie Banerji\**

## Supporting Information

[\*] M. Scarongella, Dr. N. Banerji  
Photochemical Dynamics Group  
Institute of Chemical Sciences & Engineering  
Ecole Polytechnique Fédérale de Lausanne  
CH-1015 Lausanne (Switzerland)  
E-mail: [natale.banerji@epfl.ch](mailto:natale.banerji@epfl.ch).

A. Laktionov, Prof. U. Rothlisberger  
Laboratory of Computational Chemistry and Biochemistry  
Institute of Chemical Sciences & Engineering  
Ecole Polytechnique Fédérale de Lausanne  
CH-1015 Lausanne (Switzerland)

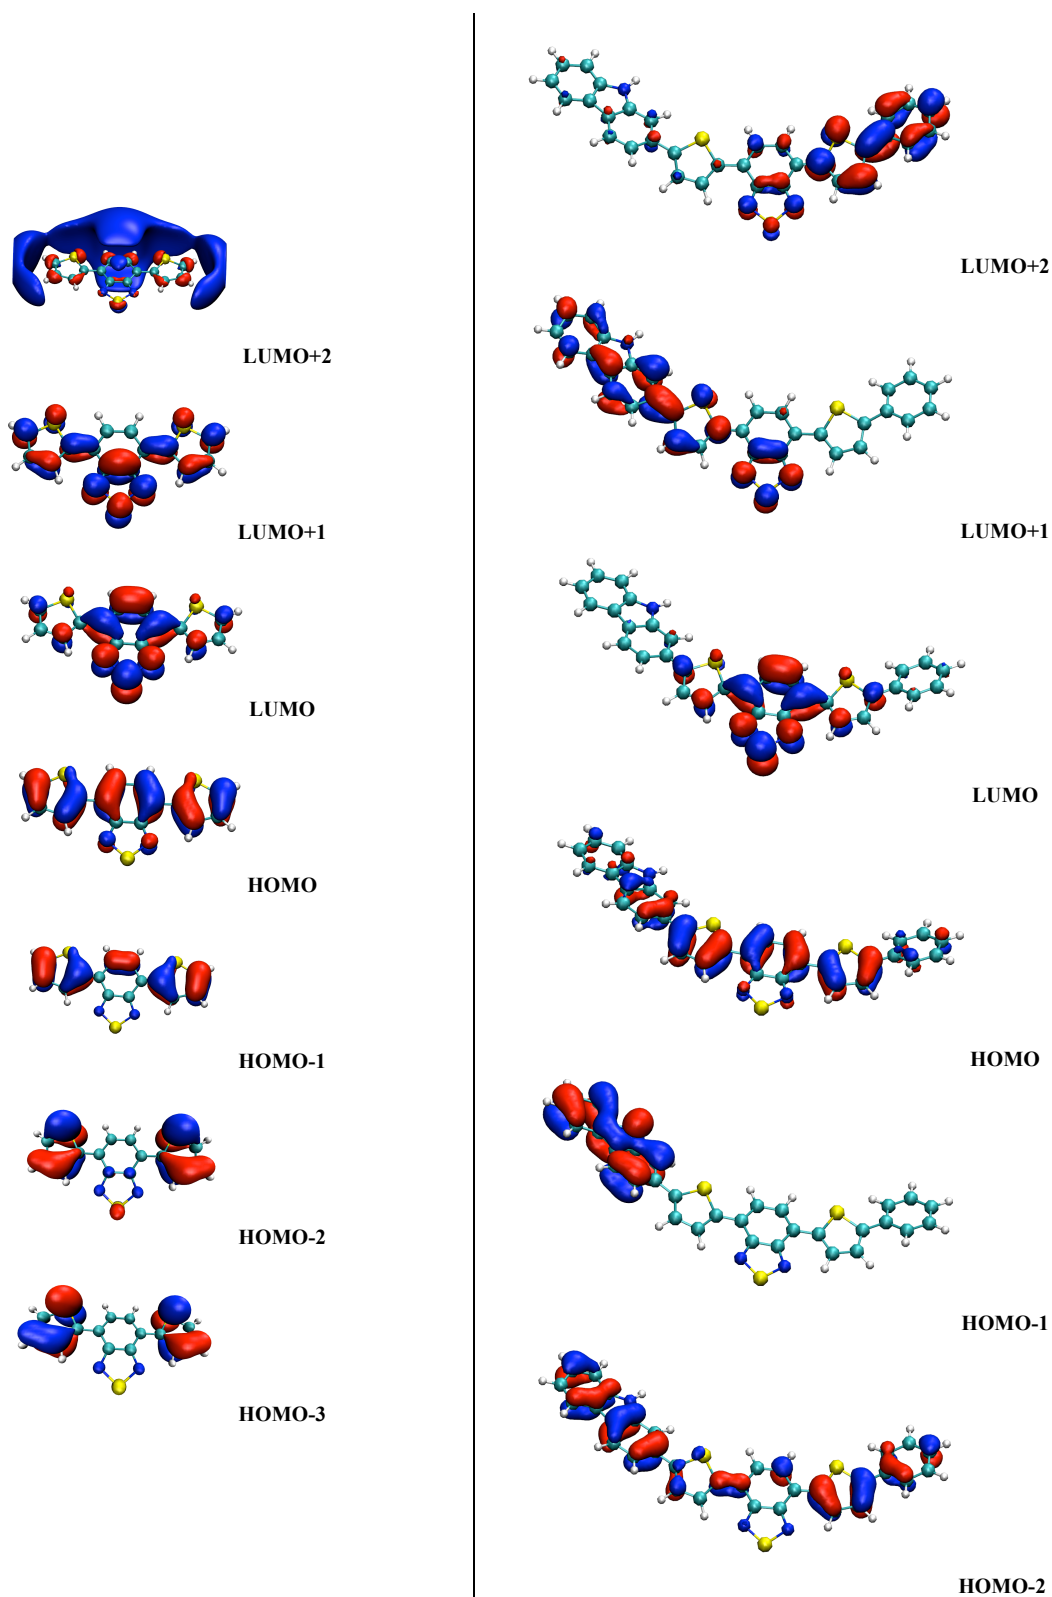

**Figure S1.** Molecular orbitals of dTBT (left) and CDTBT (right) calculated by TD-DFT (M062X/6-31+G\*, gas phase). Geometries were previously optimized using B3LYP/6-31G\*\*.

$S_0 \rightarrow S_1$  2.8146 eV  $f=0.4434$   
 HOMO  $\rightarrow$  LUMO 0.70160

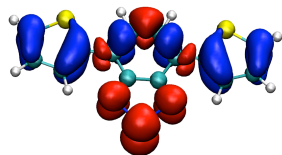

$S_0 \rightarrow S_2$  4.2164 eV  $f=0.0351$   
 HOMO-4  $\rightarrow$  LUMO 0.17433  
 HOMO-2  $\rightarrow$  LUMO -0.14419  
 HOMO-1  $\rightarrow$  LUMO 0.65451

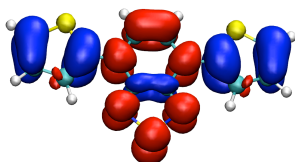

$S_0 \rightarrow S_3$  4.3570 eV  $f=0.3822$   
 HOMO-3  $\rightarrow$  LUMO -0.24556  
 HOMO-1  $\rightarrow$  LUMO+2 -0.11164  
 HOMO  $\rightarrow$  LUMO+1 0.64055

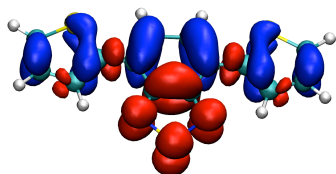

$S_0 \rightarrow S_4$  4.3596 eV  $f=0.0372$   
 $S_0 \rightarrow S_5$  4.5390 eV  $f=0.1053$   
 $S_0 \rightarrow S_6$  4.5804 eV  $f=0.0980$

$S_0 \rightarrow S_1$  2.5159 eV  $f=1.0178$   
 HOMO  $\rightarrow$  LUMO 0.68801

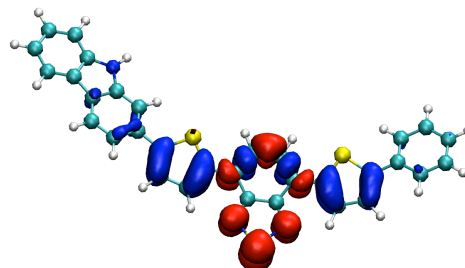

$S_0 \rightarrow S_2$  3.5502 eV  $f=0.1873$   
 HOMO-8  $\rightarrow$  LUMO -0.10020  
 HOMO-3  $\rightarrow$  LUMO 0.15910  
 HOMO-2  $\rightarrow$  LUMO 0.63603  
 HOMO  $\rightarrow$  LUMO+1 -0.16182

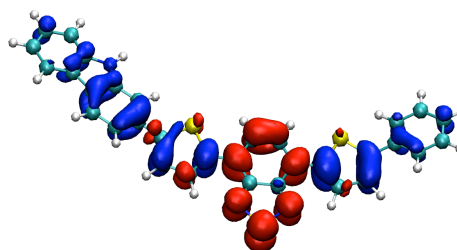

$S_0 \rightarrow S_3$  3.7816 eV  $f=0.8788$   
 HOMO-3  $\rightarrow$  LUMO 0.13393  
 HOMO-2  $\rightarrow$  LUMO 0.11809  
 HOMO-2  $\rightarrow$  LUMO+2 -0.16665  
 HOMO  $\rightarrow$  LUMO+1 0.60140  
 HOMO  $\rightarrow$  LUMO+2 -0.19309

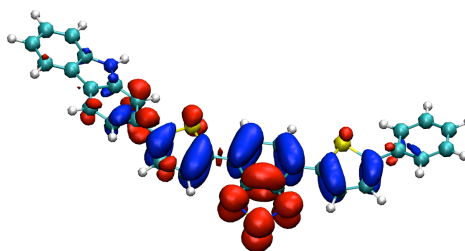

$S_0 \rightarrow S_4$  3.8684 eV  $f=0.0086$   
 $S_0 \rightarrow S_5$  4.0762 eV  $f=0.2077$

**Figure S2.** TD-DFT absorption transitions obtained for dTBT (left) and CDTBT (right) in the gas phase at the M062X/6-31+G\* level of theory. Excitation energies, oscillator strengths and decomposition into single-particle transitions with corresponding weight are given for each excited state. For the first three transitions, the difference between the excited and ground state electron density calculated for vertical absorption are also shown.

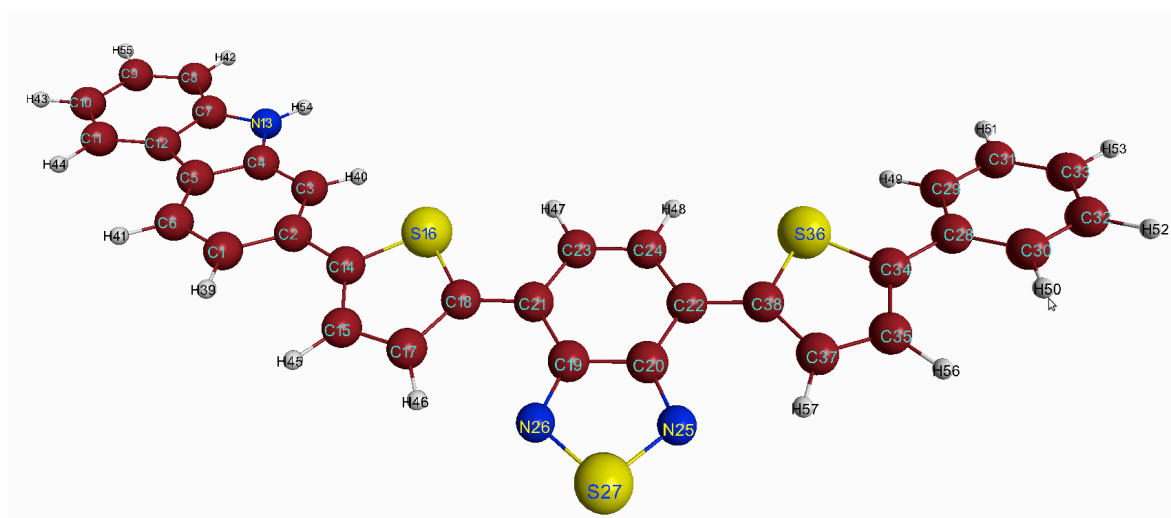

| Degree of freedom | Ground state geometry | Excited state geometry |
|-------------------|-----------------------|------------------------|
| C21-C22           | 2.946                 | 2.913                  |
| C18-C38           | 5.866                 | 5.760                  |
| C22-C24           | 1.377                 | 1.423                  |
| C23-C24           | 1.421                 | 1.375                  |
| C21-C23           | 1.377                 | 1.424                  |
| C19-C21           | 1.441                 | 1.439                  |
| C20-C19           | 1.451                 | 1.449                  |
| C20-C22           | 1.441                 | 1.438                  |
| C20-C22-C24       | 115.126°              | 116.741°               |
| C35-C34-C28-C30   | -29.056°              | -20.291°               |
| C15-C14-C2-C1     | 29.586°               | 16.664°                |
| C19-C21-C18-C17   | -15.161°              | -0.536°                |
| C20-C22-C38-C37   | 14.849°               | 0.773°                 |
| C6-C5-C12-C11     | 0.023°                | 0.038°                 |

**Root mean square deviation (RMSD) = 0.22 Å (calculated for fitted geometries)**

**Figure S3.** Numbering scheme and representative bond lengths (in Angstrom) and angles (in degrees) for the ground state geometry and relaxed  $S_1$  excited state geometry of CDTBT in the gas phase.

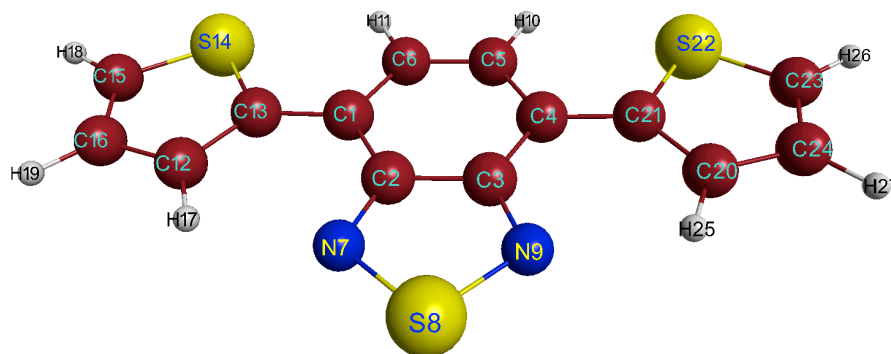

| Degree of freedom | Ground state geometry | Emitting state geometry |
|-------------------|-----------------------|-------------------------|
| C1-C4             | 2.951                 | 2.900                   |
| C4-C5             | 1.376                 | 1.428                   |
| C3-C4             | 1.441                 | 1.436                   |
| C5-C6             | 1.421                 | 1.373                   |
| C3-N9             | 1.331                 | 1.332                   |
| C4-C21            | 1.463                 | 1.427                   |
| C20-C21           | 1.376                 | 1.397                   |
| N9-S8             | 1.621                 | 1.663                   |
| C3-C4-C5          | 114.890°              | 114.226°                |
| C2-C1-C13-C12     | 0°                    | 0°                      |
| C3-C4-C21-C20     | 0°                    | 0°                      |

**Root mean square deviation (RMSD) = 0.05 Å (calculated for fitted geometries)**

**Figure S4.** Numbering scheme and representative bond lengths (in Angstrom) and angles (in degrees) for the ground state geometry and relaxed S<sub>1</sub> excited state geometry of dTBT in the gas phase.

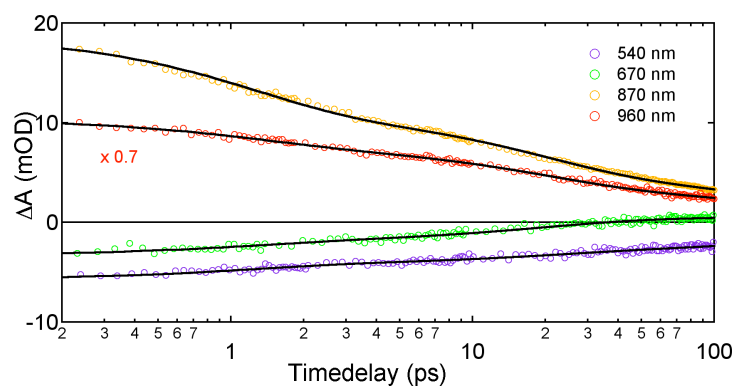

**Figure S5.** Transient absorption dynamics of CDTBT thin film at selected probe wavelengths, following excitation at 510 nm (solid lines represent the best multiexponential global fit).

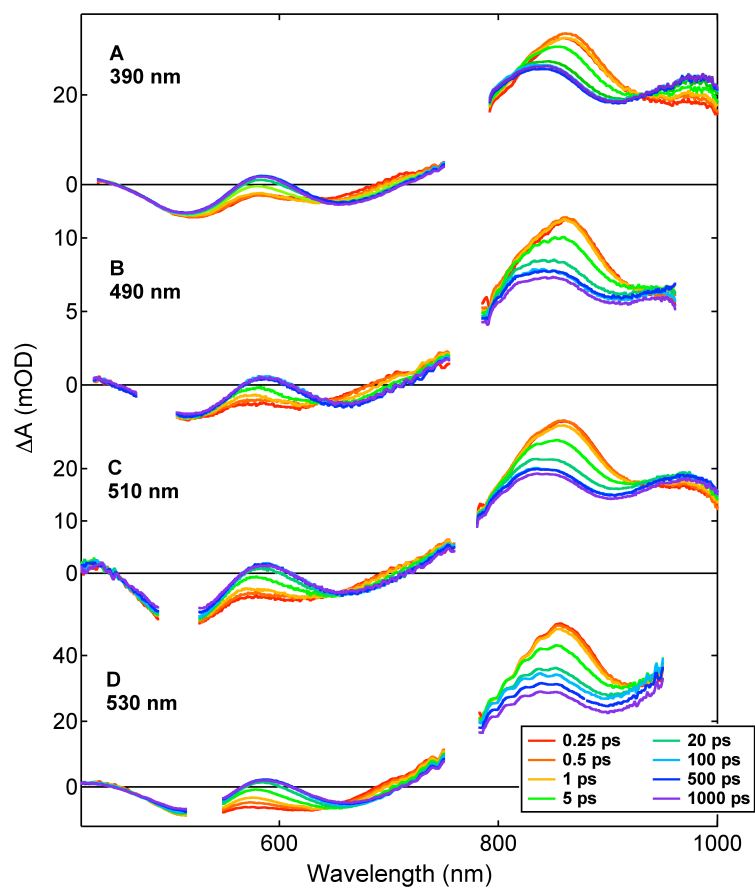

**Figure S6.** Transient absorption spectra of CDTBT in DCB at various time delays following excitation at 400 nm, 490 nm, 510 nm and 530 nm.

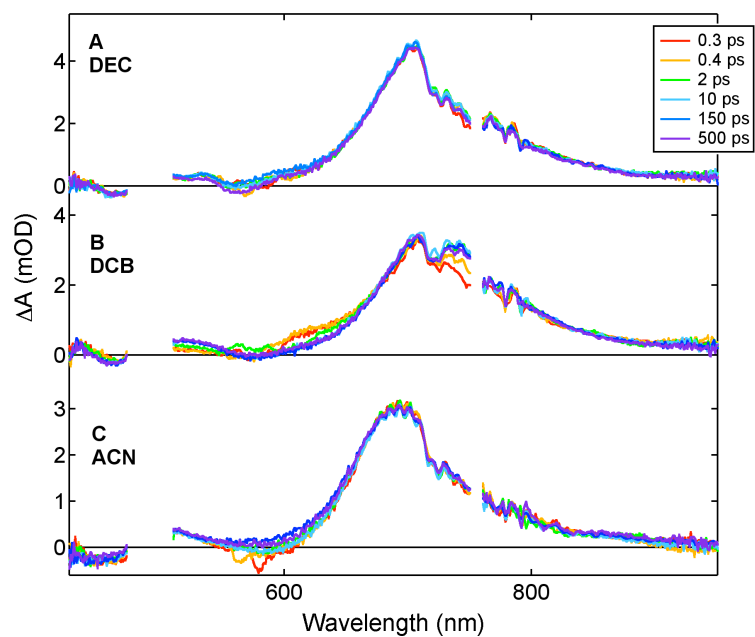

**Figure S7.** Transient absorption spectra of dTBT in different solvents, recorded at various time delays following excitation at 490 nm.



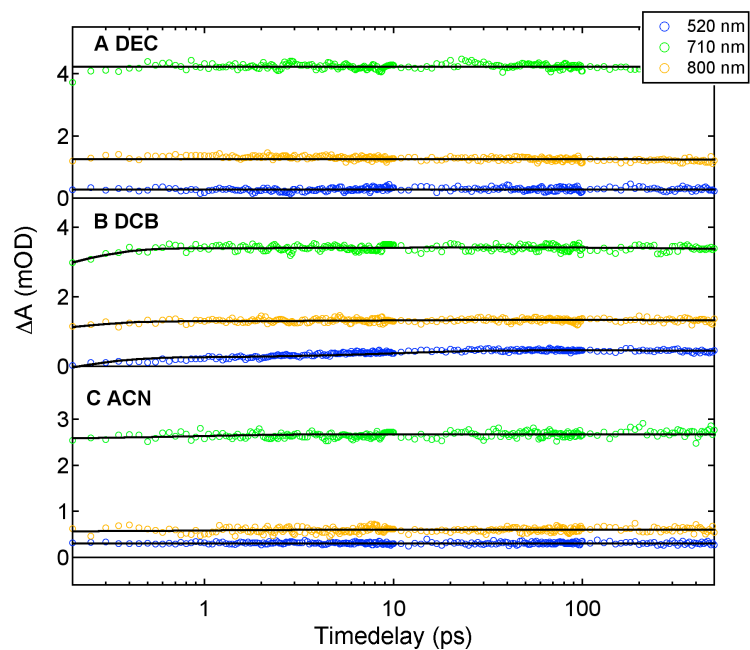

**Figure S8.** Transient absorption dynamics of dTBT in different solvents at selected probe wavelengths, following excitation at 490 nm (solid lines represent the best multiexponential global fit).

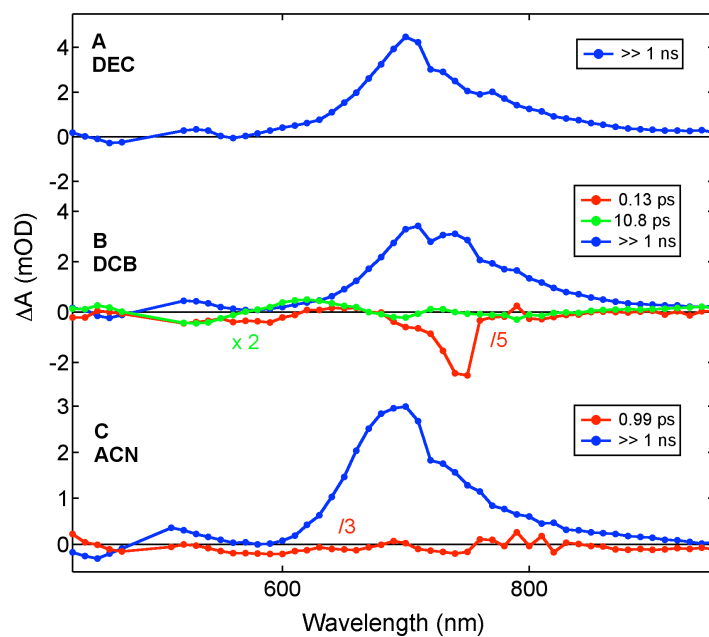

**Figure S9.** Amplitude spectra associated with the time constants resulting from a multiexponential global analysis of the transient absorption dynamics of dTBT in different solvents, recorded following excitation at 490 nm.
